# Supplementary figures and images for: Multi-scale mapping along the auditory hierarchy using high-resolution functional UltraSound in the awake ferret
Source: eLife journal article supplement (doi:10.7554/elife.35028), 2018-06-28

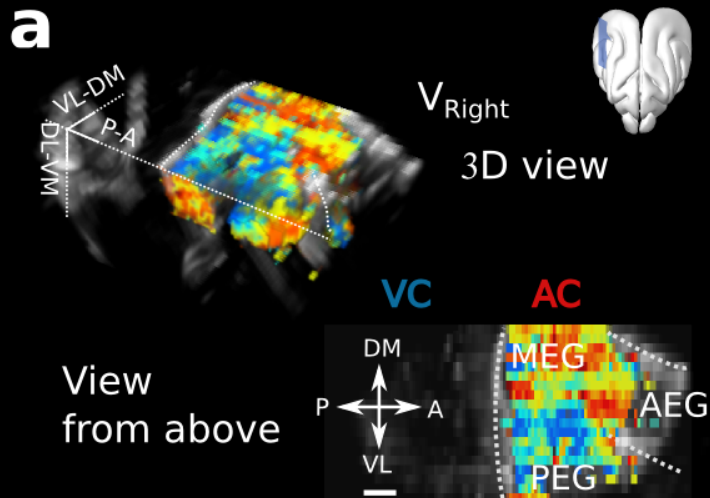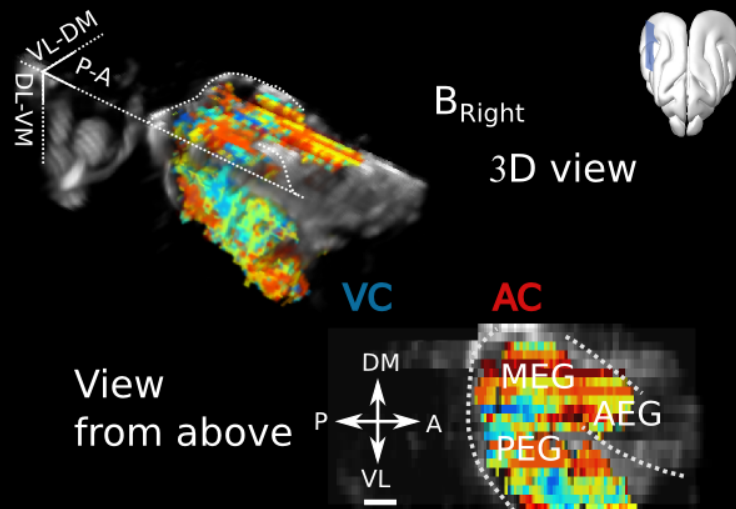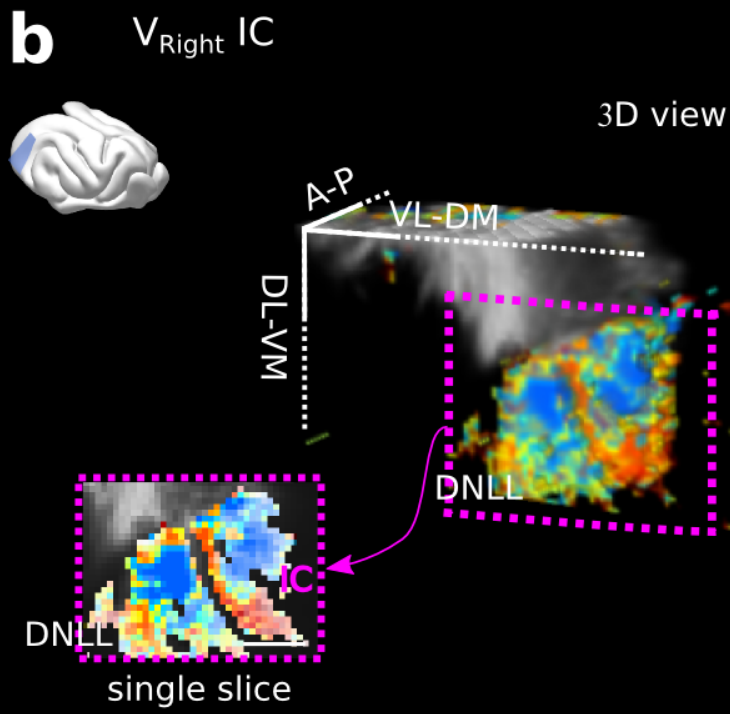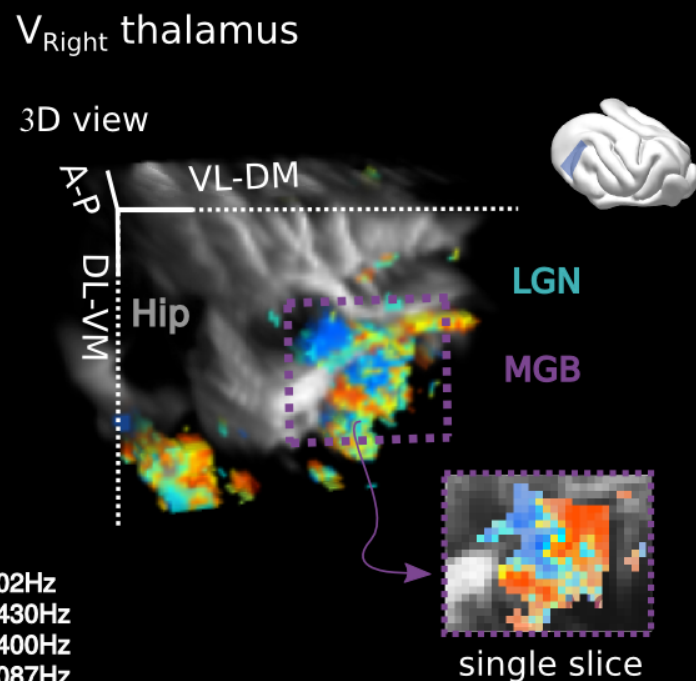

Supplement: supp [file elife_poa_e35028_Figure_1_Figure_Supplement_2.pdf › elife_poa_e35028_Figure_1_Figure_Supplement_2.pdf]

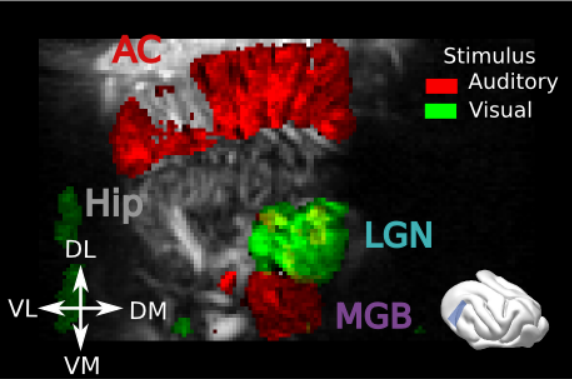

Supplement: supp [file elife_poa_e35028_Figure_1_figure_supplement_1.pdf › elife_poa_e35028_Figure_1_figure_supplement_1.pdf]

**a**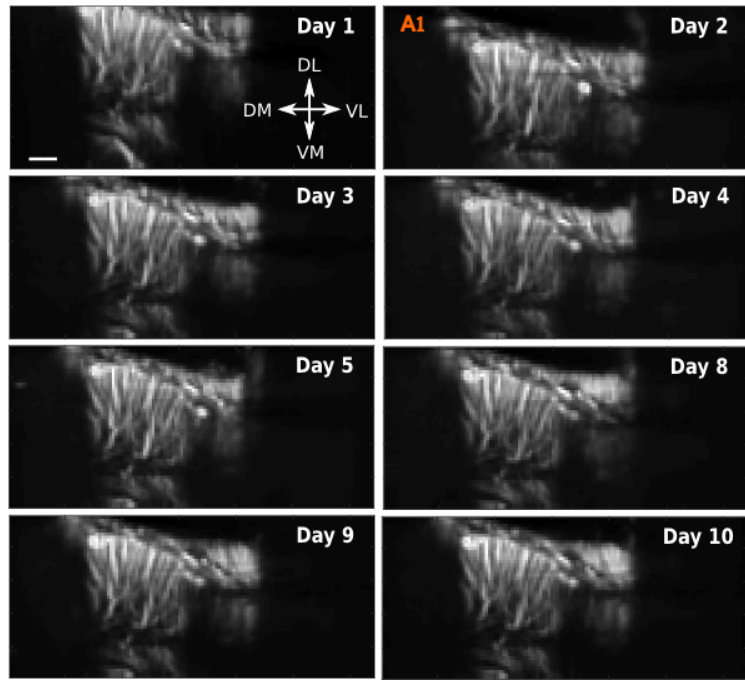**b**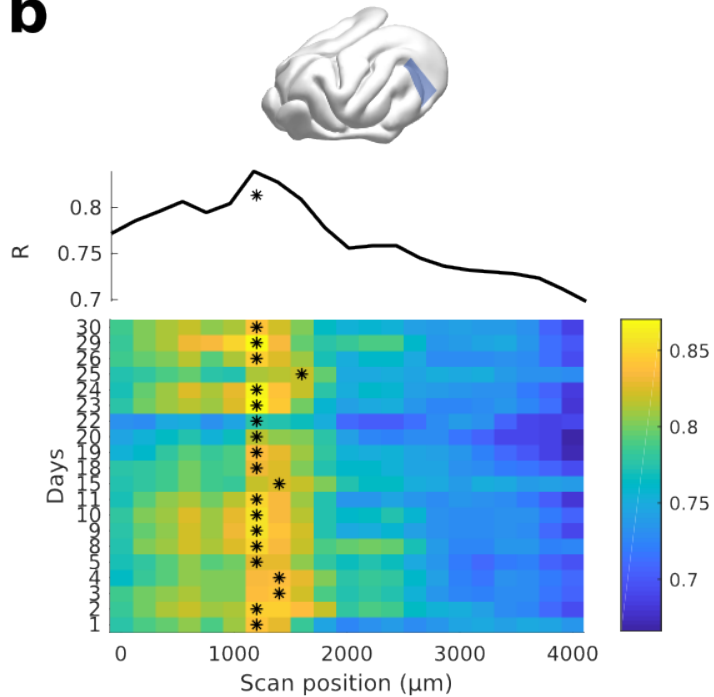

Supplement: supp [file elife_poa_e35028_Figure_1_figure_supplement_3.pdf › elife_poa_e35028_Figure_1_figure_supplement_3.pdf]

**a**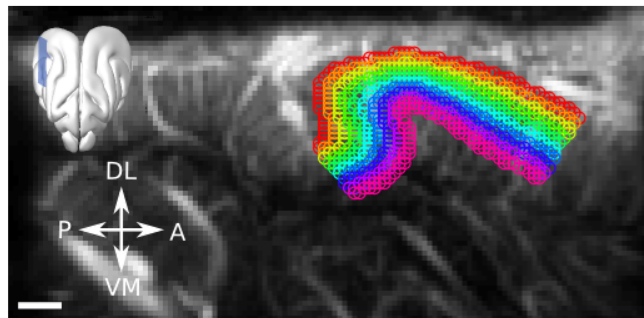**b**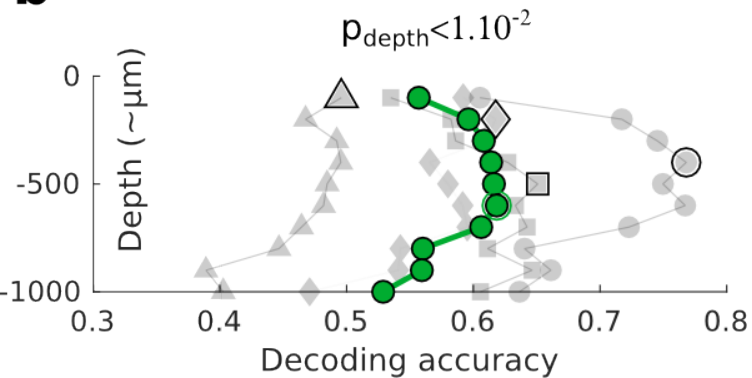**c**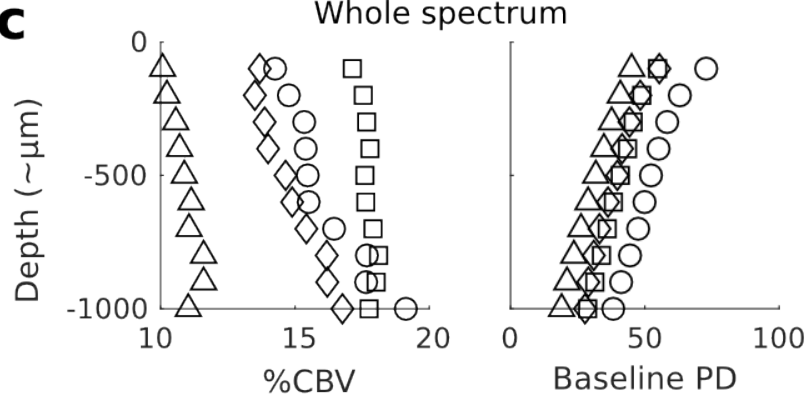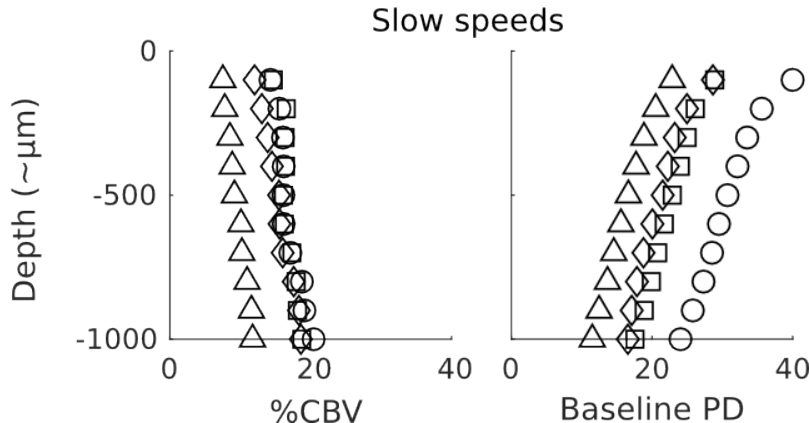

Supplement: supp [file elife_poa_e35028_Figure_2_figure_supplement_1.pdf › elife_poa_e35028_Figure_2_figure_supplement_1.pdf]

**a**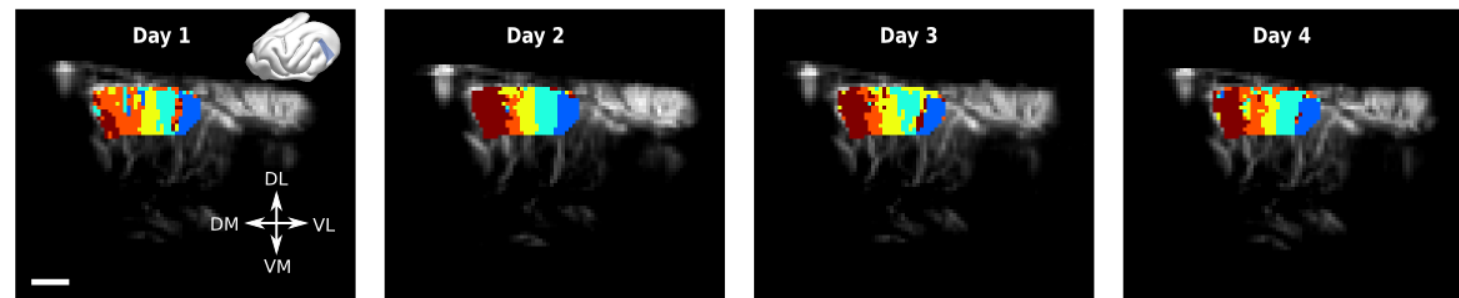**b**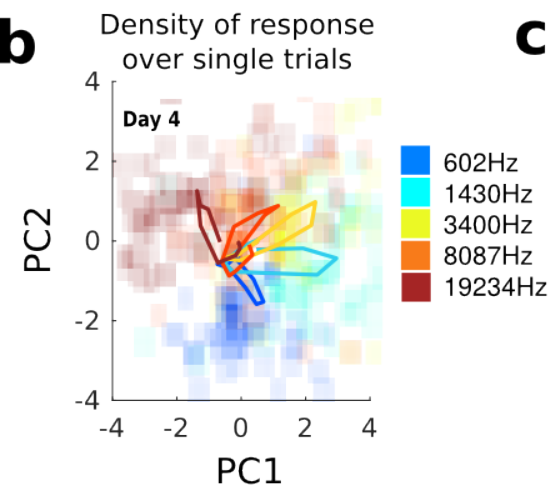**c**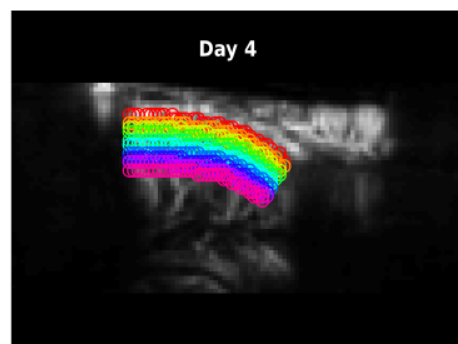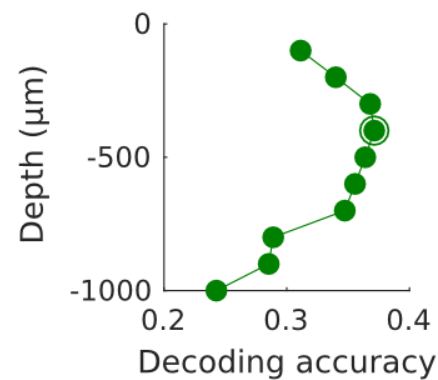**d**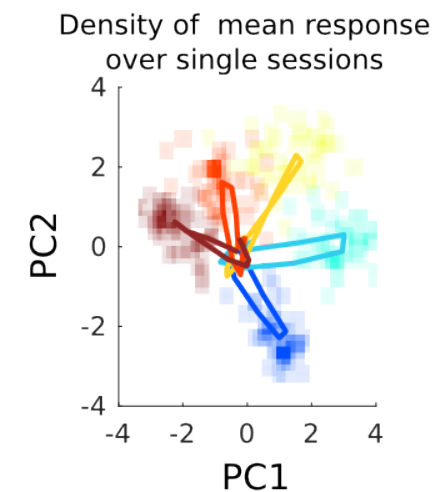**e**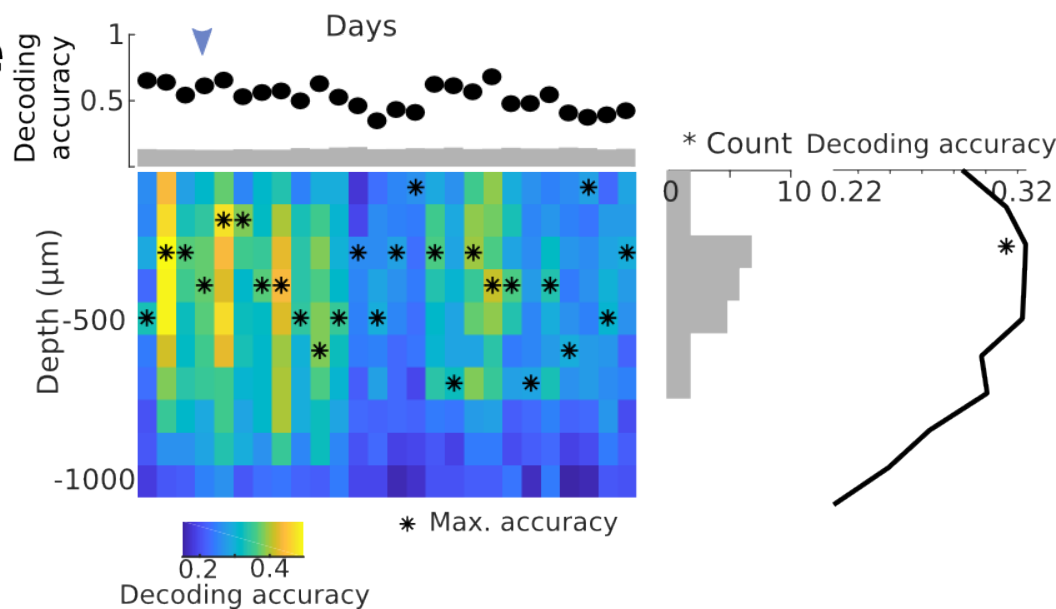

Supplement: supp [file elife_poa_e35028_Figure_2_figure_supplement_2.pdf › elife_poa_e35028_Figure_2_figure_supplement_2.pdf]

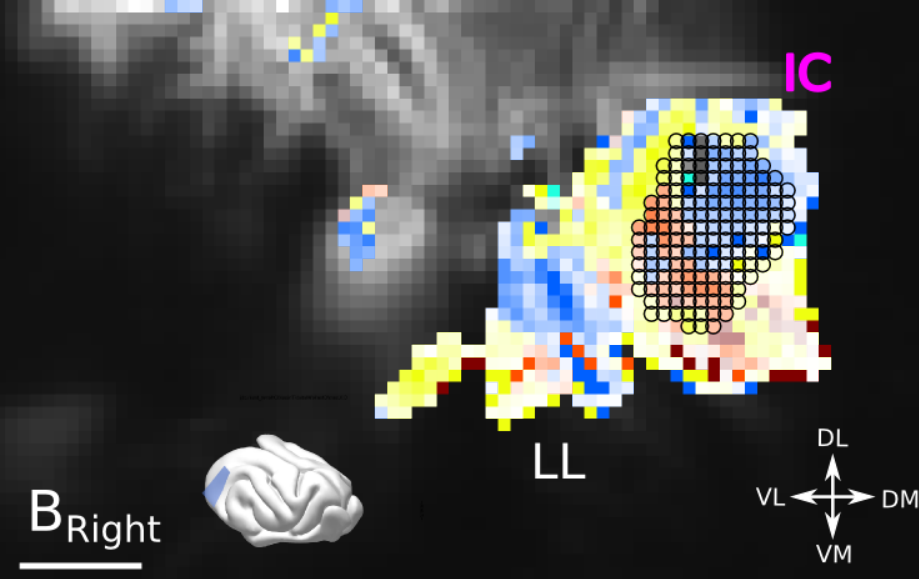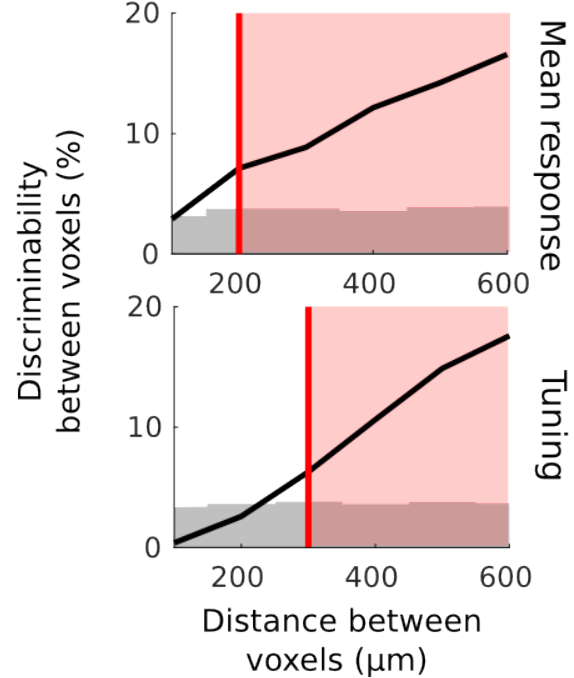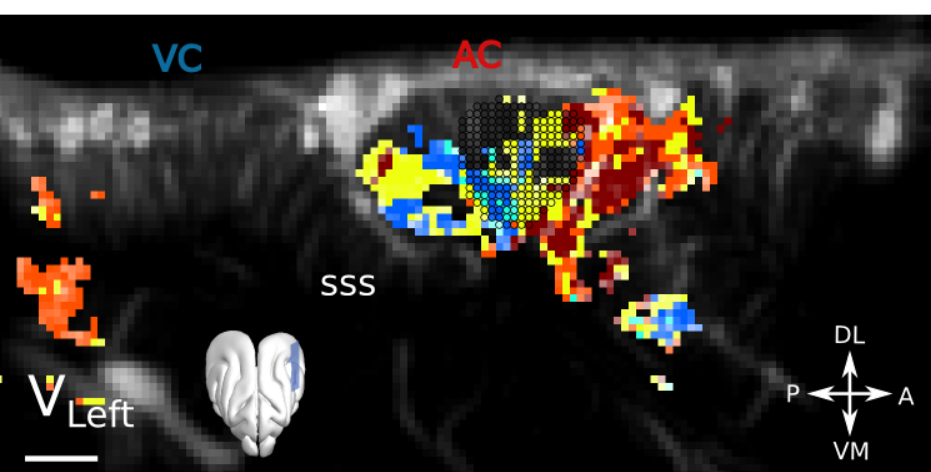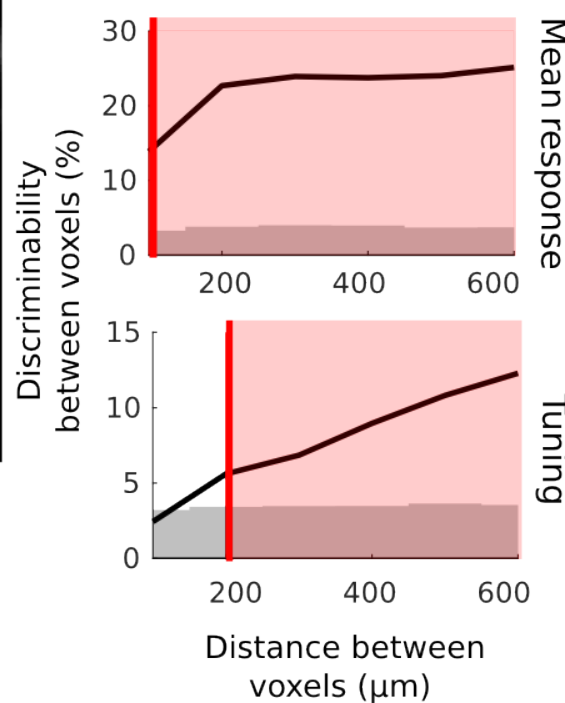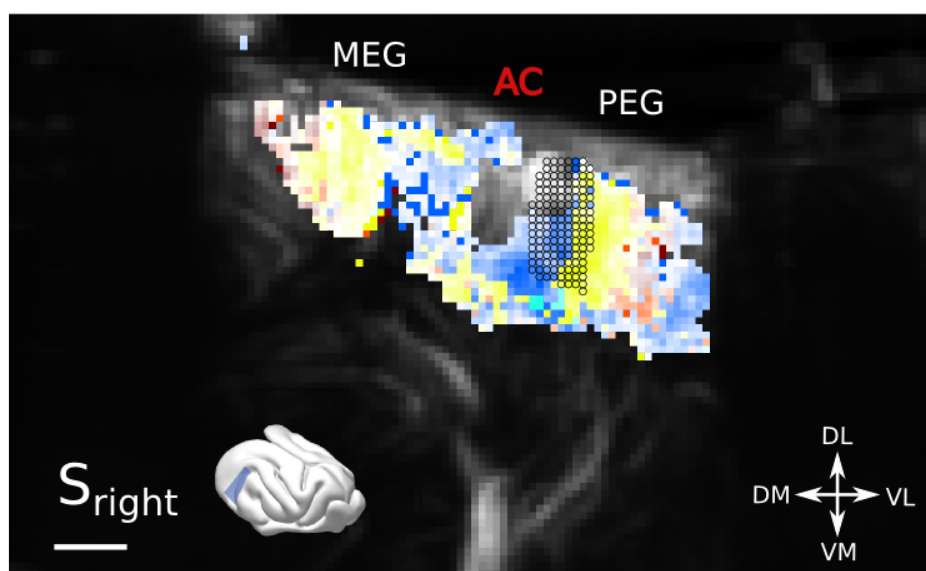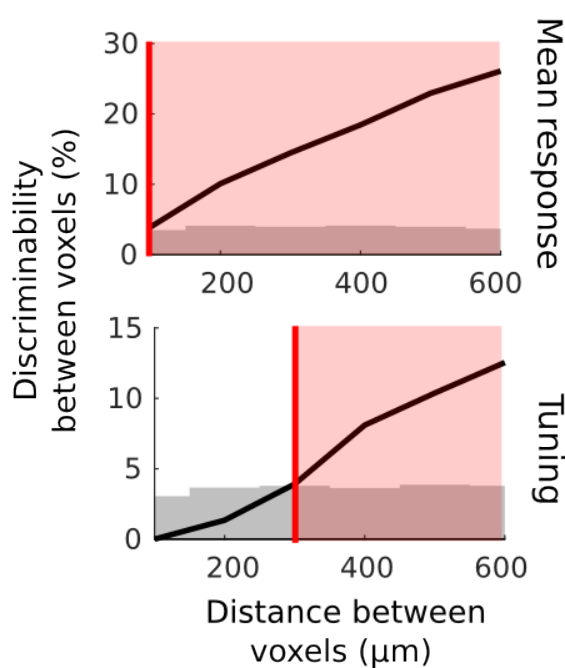

Supplement: supp [file elife_poa_e35028_Figure_2_figure_supplement_3.pdf › elife_poa_e35028_Figure_2_figure_supplement_3.pdf]

%CBV

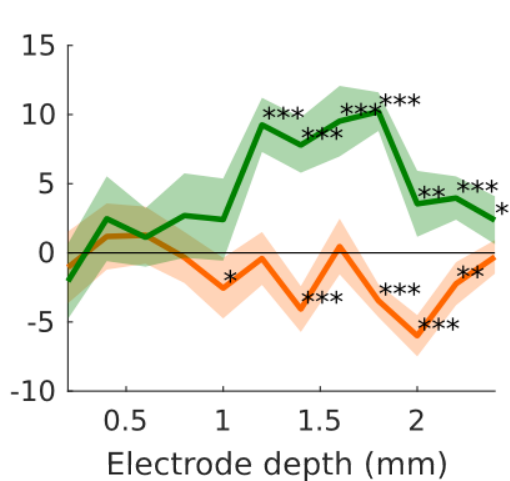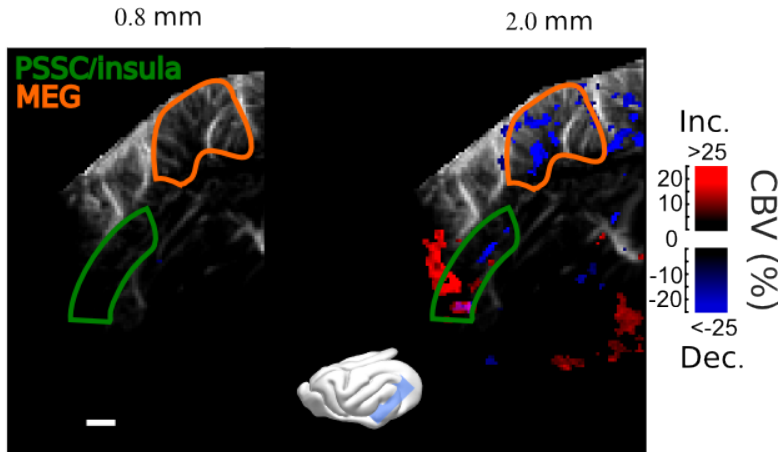

Supplement: supp [file elife_poa_e35028_Figure_3_figure_supplement_1.pdf › elife_poa_e35028_Figure_3_figure_supplement_1.pdf]

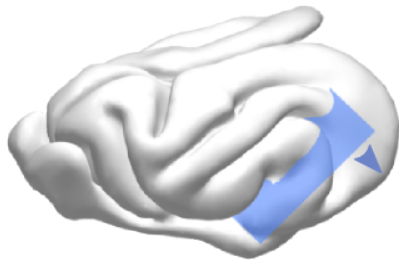

Over the pss  
0 mm

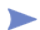

Towards PEG  
0.3 mm

0.6 mm

0.9 mm

1.2 mm

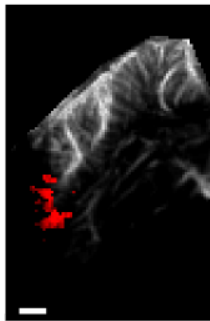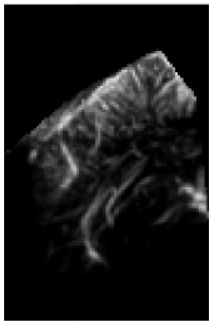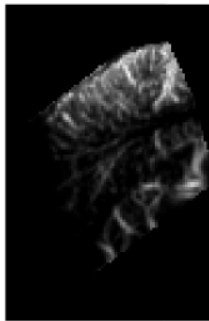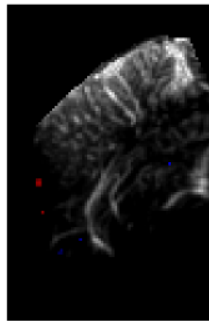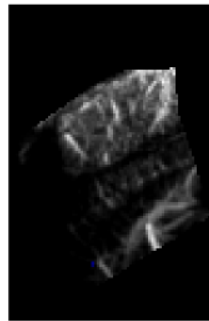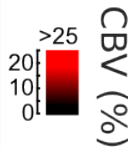

Supplement: supp [file elife_poa_e35028_Figure_3_figure_supplement_2.pdf › elife_poa_e35028_Figure_3_figure_supplement_2.pdf]

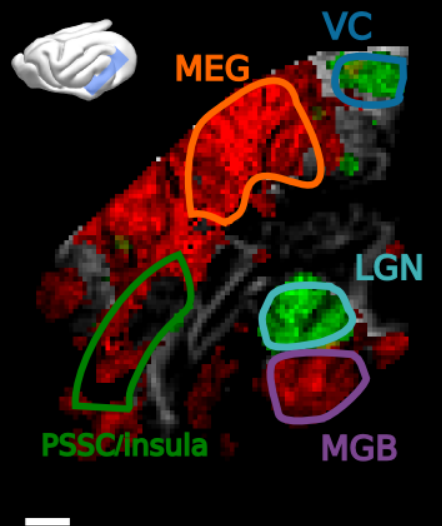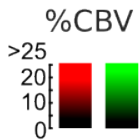

Stimulus  
Auditory  
Visual

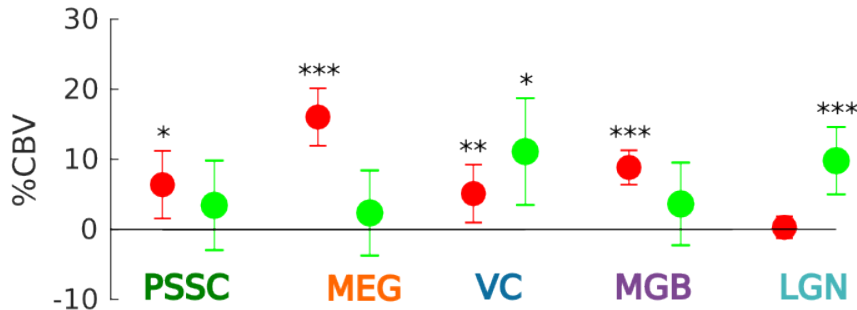

Supplement: supp [file elife_poa_e35028_Figure_3_figure_supplement_3.pdf › elife_poa_e35028_Figure_3_figure_supplement_3.pdf]
